# Supplementary material
Source: publisher site journal article supplement (https://static.cambridge.org/content/id/urn:cambridge.org:id:article:S0959270920000234/resource/name/S0959270920000234supp001.docx)
Supplement: Supplementary file 1 [file S0959270920000234supp001.docx]

**Supplementary Material**

Distribution of Olrog’s Gull *Larus atlanticus* from Bahía San Blas during the non-breeding period: signals of partial migration

SOFIA COPELLO, NICOLAS SUÁREZ, PABLO YORIO, MARIA T. RAVASI, JESICA A. PAZ, PABLO GARCÍA BORBOROGLU, MARICEL GRAÑA GRILLI, MARCO FAVERO and JUAN P. SECO PON

**Contents**

Table S1. Summary of GLS-tracked Olrog’s Gulls from Islote Arroyo Jabalí Oeste, San Blas during 2014/2015 season.

Table S1. Summary of GLS-tracked Olrog’s Gulls from Islote Arroyo Jabalí Oeste, San Blas during 2014/2015 season. Colony= bird recorded in the colony during the following breeding season. N= no, Y= yes.

|  | **Plastic**  **Band** | **Sex** | **Recapture** | **Available Data** | **Colony** |
| --- | --- | --- | --- | --- | --- |
| 1 | ATA | M | N | N | N |
| 2 | ATP | M | Y | Y | Y |
| 3 | ATO | F | N | N | N |
| 4 | AUD | F | N | N | N |
| 5 | ATF | F | N | N | N |
| 6 | ATH | M | Y | Y | Y |
| 7 | ATS | M | Y | Y | Y |
| 8 | ATB | F | Y | Y | Y |
| 9 | ATI | M | Y | Y | Y |
| 10 | ATL | M | N | N | N |
| 11 | ATD | M | Y | Y | Y |
| 12 | ATN | F | Y | Y | Y |
| 13 | ATT | F | Y | Y | Y |
| 14 | 273 | F | Y | Y | Y |
| 15 | ATK | M | Y | Y | Y |
| 16 | ATC | M | Y | Y | Y |
| 17 | APL | F | Y | Y | Y |
| 18 | ATY | F | N | N | Y |
| 19 | ATW | M | Y | N | Y |
| 20 | ATU | M | Y | Y | Y |
| 21 | ATX | F | N | N | N |
| 22 | APK | M | Y | Y | Y |
| 23 | AUK | F | Y | Y | Y |
| 24 | AUA | F | Y | Y | Y |
| 25 | AUC | M | Y | Y | Y |
| 26 | AUH | M | N | N | Y |
| 27 | AUI | M | N | N | N |
| 28 | AUB | M | Y | Y | Y |
| 29 | AUF | M | Y | Y | Y |
| 30 | AUL | M | Y | Y | Y |
| 31 | ATZ | F | Y | N | Y |
| 32 | 291 | F | Y | Y | Y |
